# Supplementary material for: Development of an effective microsatellite marker system to determine the genetic structure of Meriones meridianus populations
Source: PubMed Central journal article supplement — Exp Anim. 2020 Feb 14;69(2):224–32. doi: 10.1538/expanim.19-0077 (PMC7220706; doi:10.1538/expanim.19-0077), 2020-02-14
Supplement: expanim-69-224-s001.pdf [file expanim-69-224-s001.pdf]

Genotypes of *M. m. jei*

| <i>AF200941</i> | <i>AF200942</i> | <i>AF200943</i> | <i>AF200944</i> | <i>AF200945</i> | <i>AF200947</i> | <i>Mit22</i> | <i>D3Mit130</i> | <i>D8Mit56</i> | <i>D17Mit38</i> | <i>Mit26</i> |
|-----------------|-----------------|-----------------|-----------------|-----------------|-----------------|--------------|-----------------|----------------|-----------------|--------------|
| AF              | DD              | AD              | FH              | EE              | BF              | AC           | CC              | AA             | DD              | BC           |
| AB              | AD              | FF              | BC              | EF              | BF              | AC           | AB              | AA             | DD              | CD           |
| AD              | AD              | DE              | BB              | CC              | CH              | AC           | BB              | AA             | ED              | BB           |
| CC              | DD              | EI              | FJ              | FF              | AB              | AC           | BB              | AA             | DD              | AA           |
| AB              | DD              | DI              | DF              | DD              | EF              | AB           | BB              | AA             | DD              | BD           |
| FF              | DD              | DE              | BF              | EE              | BE              | AB           | BB              | AA             | DD              | BE           |
| AD              | AD              | DE              | BF              | CE              | GH              | AC           | BB              | AA             | DD              | AA           |
| BB              | DE              | DI              | BD              | DD              | DF              | AB           | BB              | AA             | BD              | BD           |
| BF              | DE              | DE              | BF              | EE              | BD              | AB           | BB              | AA             | CD              | BE           |
| AB              | DE              | BE              | BD              | EF              | DF              | BB           | BB              | AA             | BD              | BD           |
| EG              | BB              | AC              | AM              | AB              | DH              | AB           | CC              | AA             | AB              | CC           |
| BE              | DE              | DE              | CK              | EE              | BE              | AC           | BB              | AA             | DD              | BD           |
| CD              | DF              | EH              | JK              | EF              | EF              | AB           | BB              | AA             | DD              | AC           |
| CF              | DF              | BE              | BB              | FF              | CG              | AC           | BB              | AA             | DD              | AA           |
| AC              | DF              | DD              | DF              | CE              | EF              | AB           | BB              | AA             | CD              | BC           |
| AB              | DE              | DE              | FJ              | EE              | EE              | AB           | BB              | AA             | CD              | AD           |
| BB              | DE              | BI              | DE              | DD              | DD              | AB           | BB              | AA             | BD              | BD           |
| CD              | DD              | EH              | FJ              | CE              | EF              | AB           | BB              | AA             | DD              | AC           |
| DF              | BB              | AC              | AM              | AB              | DH              | AB           | CC              | AA             | BD              | CC           |
| BF              | DE              | DE              | BF              | EG              | CC              | AC           | BB              | AA             | DD              | CC           |
| AF              | DD              | DE              | BF              | CE              | BG              | BC           | BB              | AA             | DD              | DD           |
| AB              | DF              | DI              | FF              | EG              | DH              | AC           | BB              | AA             | DD              | AC           |
| AA              | DD              | DD              | BJ              | CF              | DE              | AB           | BB              | AA             | CD              | AA           |
| BB              | DE              | DE              | FL              | DE              | DE              | AB           | BB              | AA             | CD              | DD           |
| AF              | DF              | DI              | CF              | CG              | CD              | AC           | BB              | AA             | CD              | BC           |
| AC              | DE              | BI              | FL              | DD              | DF              | AB           | BB              | AA             | DD              | BD           |
| BD              | DF              | DE              | CF              | CG              | CH              | AC           | BB              | AA             | CD              | BC           |
| AD              | AD              | DD              | CF              | CF              | BH              | AC           | BB              | AA             | DD              | AA           |
| AB              | AD              | FF              | CC              | EF              | BF              | AC           | AB              | AA             | DD              | AD           |
| AC              | DF              | AD              | BH              | EE              | BE              | AC           | BB              | AA             | DD              | BC           |
| BD              | DF              | DE              | CF              | EF              | GH              | ..           | BB              | AA             | DD              | AC           |
| AB              | DG              | DF              | CC              | DF              | BF              | AC           | AB              | AA             | DD              | DD           |
| AD              | DG              | FG              | CJ              | CD              | BC              | AB           | BB              | AA             | CD              | AA           |
| EF              | BB              | AC              | NM              | AA              | DH              | AA           | BB              | AA             | BD              | CC           |
| AC              | DD              | BJ              | CF              | CF              | FG              | AC           | BB              | AA             | CD              | BB           |
| AD              | DD              | DE              | CF              | CF              | BH              | AC           | BB              | AA             | DD              | AA           |
| CF              | CD              | DD              | CC              | CD              | EE              | AB           | BB              | AA             | BD              | ..           |
| AB              | DD              | FG              | CC              | CD              | BE              | AB           | AB              | AA             | DD              | AD           |
| AF              | DE              | DI              | FF              | CC              | FG              | BC           | BB              | AA             | CD              | BC           |

Genotypes of *M. m. cryptorhinus*

| <i>AF200941</i> | <i>AF200942</i> | <i>AF200943</i> | <i>AF200944</i> | <i>AF200945</i> | <i>AF200947</i> | <i>Mit22</i> | <i>D3Mit130</i> | <i>D8Mit56</i> | <i>D17Mit38</i> | <i>Mit26</i> |
|-----------------|-----------------|-----------------|-----------------|-----------------|-----------------|--------------|-----------------|----------------|-----------------|--------------|
| EE              | AC              | BB              | BC              | AC              | AB              | AB           | AA              | BC             | AC              | AA           |
| DD              | BC              | BB              | BC              | BB              | AA              | AB           | AA              | BC             | CC              | AA           |
| DD              | BC              | BB              | BC              | BD              | AB              | AB           | AA              | BC             | AC              | AA           |
| EE              | CD              | BB              | CD              | BC              | AA              | BB           | AA              | BC             | AC              | AA           |
| AB              | CD              | BB              | CC              | BD              | AA              | AB           | AA              | BC             | AC              | AA           |
| EE              | AC              | BB              | BD              | DD              | AB              | AB           | AA              | BC             | AC              | AA           |
| DD              | CD              | BB              | BC              | BD              | AA              | AB           | AA              | BC             | CC              | AA           |
| DD              | CD              | BB              | BC              | BB              | AA              | AB           | AA              | BC             | AC              | AA           |
| DD              | CD              | BB              | BC              | BB              | AA              | AB           | AA              | BC             | BC              | AA           |

|    |    |    |    |    |    |    |    |    |    |    |
|----|----|----|----|----|----|----|----|----|----|----|
| DD | BC | BB | BC | BB | AB | AB | AA | BC | AC | AA |
| CD | AC | BB | CD | CD | AA | AB | AA | BC | CC | AA |
| DD | AC | BB | AD | BD | AB | BB | AA | BC | CC | AA |
| BC | CD | BB | AC | CD | AA | AB | AA | BC | AC | AA |
| DD | CD | BB | BD | BD | AA | AB | AA | BC | AC | AA |
| BB | CD | BB | CC | CD | AB | AB | AA | BC | AC | AA |
| EE | CD | BB | CD | CC | AA | AB | AA | BC | AC | AA |
| EE | AC | BB | CD | BC | AA | AB | AA | BC | AC | AA |
| EE | AC | AB | CC | CD | AA | AB | AA | BC | AC | AA |
| BB | CD | BB | CC | BD | AA | AB | AA | BC | AC | AA |
| DD | AC | BB | CC | BC | AA | BB | AA | BC | CC | AA |
| DE | AC | BB | CD | BC | AB | AB | AA | BC | CC | AA |
| BE | AC | BB | CD | BC | AA | AB | AA | BC | CC | AA |
| CC | CD | BB | DD | BB | AA | AB | AA | BC | CC | AA |
| EE | CD | BB | BD | BC | AA | AB | BB | BC | CC | AA |

Supplementary Table 1. Genotypes of each microsatellite locus in the two *Meriones meridianus* gerbil populations.
